# Supplementary material for: Architecture of Anoteropora latirostris (Bryozoa, Cheilostomata) and implications for their biomineralization
Source: Springer Nature journal article supplement (doi:10.1038/s41598-019-47848-4), 2019-08-07
Supplement: MOESM2 [file 41598_2019_47848_MOESM2_ESM.mp4]

Archive with 3 entries (2 files):
- Hx9.mp4
- __MACOSX/
- __MACOSX/._Hx9.mp4
