# Supplementary material for: Architecture of Anoteropora latirostris (Bryozoa, Cheilostomata) and implications for their biomineralization
Source: Sci Rep. 2019 Aug 7;9:11439. doi: 10.1038/s41598-019-47848-4 (PMC6685955; doi:10.1038/s41598-019-47848-4)
Supplement: Supplementary file 3 — Dataset 1 [file 41598_2019_47848_MOESM3_ESM.zip]

Archive with 5 entries (2 files):
- Images/
- Images/Anoteropora EBSD map high res.jpg
- __MACOSX/
- __MACOSX/Images/
- __MACOSX/Images/._Anoteropora EBSD map high res.jpg
